# Supplementary material
Source: PubMed Central journal article supplement (PMC6437507)
Supplement: AAC.01989-18-s0001.pdf [file AAC.01989-18-s0001.pdf]

**Dose Optimization of Colistin Combinations against Carbapenem-Resistant *Acinetobacter baumannii* from Chinese Hospital-acquired Pneumonia Patients Using *In Vitro* PK/PD Model**

Xingchen Bian<sup>1,2#</sup>, Xiaofen Liu<sup>1#</sup>, Yuancheng Chen<sup>1,3</sup>, Daijie Chen<sup>4</sup>, Jian Li<sup>5</sup>, Jing Zhang<sup>1,3\*</sup>

<sup>1</sup> Institute of Antibiotics, Huashan Hospital, Fudan University & Key Laboratory of Clinical Pharmacology of Antibiotics, National Health and Family Planning Commission & National Clinical Research Center for Aging and Medicine, Huashan Hospital, Fudan University, Shanghai, 200040, China;

<sup>2</sup> College of Life Sciences, Shanghai Normal University, Shanghai, 200234, China;

<sup>3</sup> Phase I Unit, Huashan Hospital, Fudan University, Shanghai, 200040, China;

<sup>4</sup> Shanghai Jiaotong University, Shanghai, 200240, China;

<sup>5</sup> Biomedicine Discovery Institute and Department of Microbiology, 19 Innovation Walk, Monash University, Victoria 3800, Melbourne, Australia

\*Corresponding author

#The authors contributed equally to the manuscript

Address correspondence to: 12 Wulumuqi Zhong Rd, Shanghai, 200040, China; Email:

[zhangj\\_fudan@aliyun.com](mailto:zhangj_fudan@aliyun.com); Phone: +86-21-52888190.

**Key words:** *Acinetobacter baumannii*, carbapenem resistance, colistin, meropenem, combination therapy, PK/PD modeling

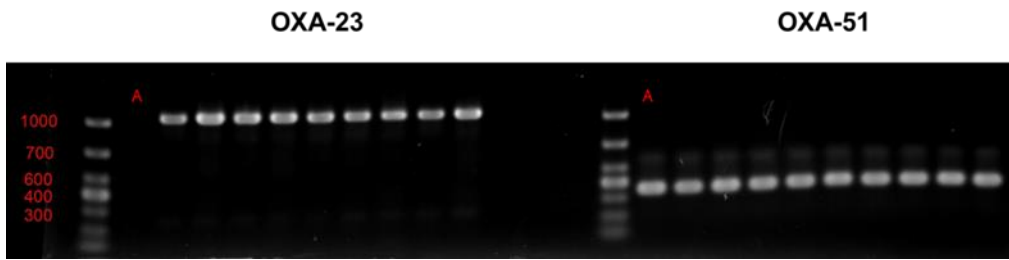

**Fig. S1** PCR results of *bla*<sub>OXA-23</sub> and *bla*<sub>OXA-51</sub> for MDR *A. baumannii* and ATCC19606

(A).

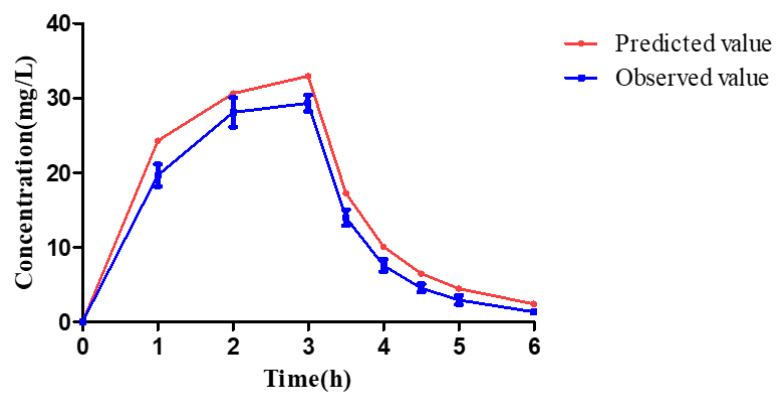

**Fig. S2** Concentration-time curves of meropenem dosed at 2 g with 3-h infusion.

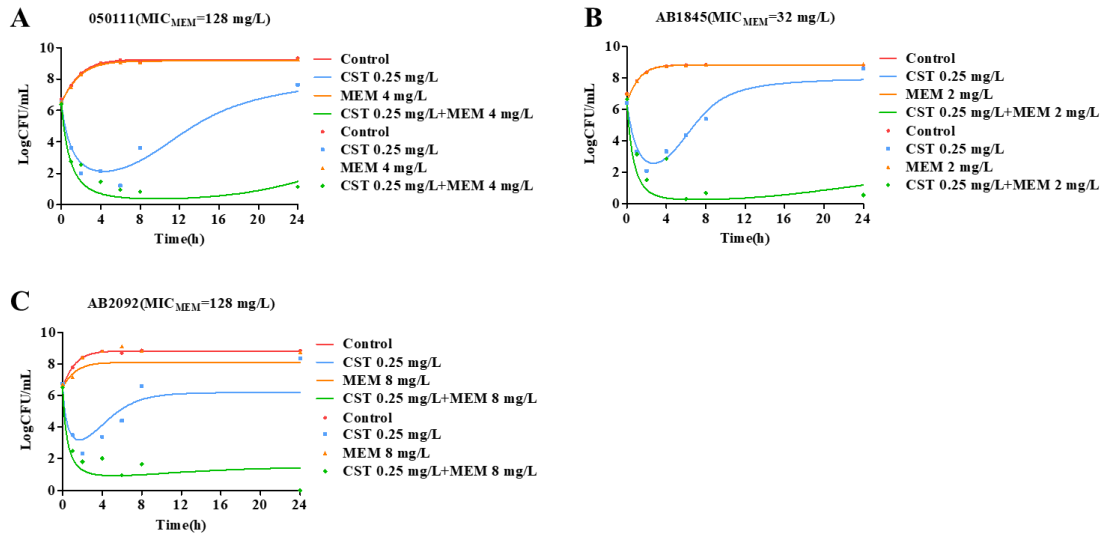

**Fig. S3** Observed (symbols) and model fitted (lines) viable counts for the static time-kill experiments with meropenem or colistin alone and in combination against *A. baumannii* 050111(A), AB1845(B) and AB2092(C). CST, colistin; MEM, meropenem.

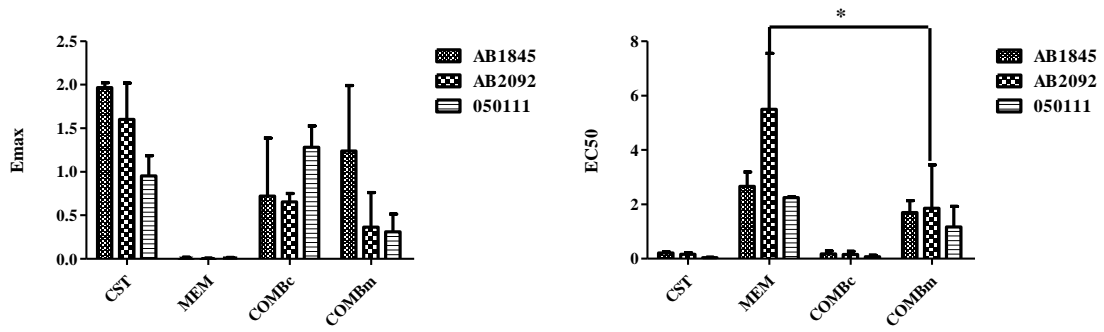

**Fig. S4** Comparison of estimated parameters  $E_{max}$  and  $EC_{50}$  for the three strains in the static time-kill study. CST and MEM represent colistin and meropenem parameters in monotherapy; COMBc and COMBm represent colistin and meropenem parameters in the combination therapy (\*:  $p < 0.05$ ).

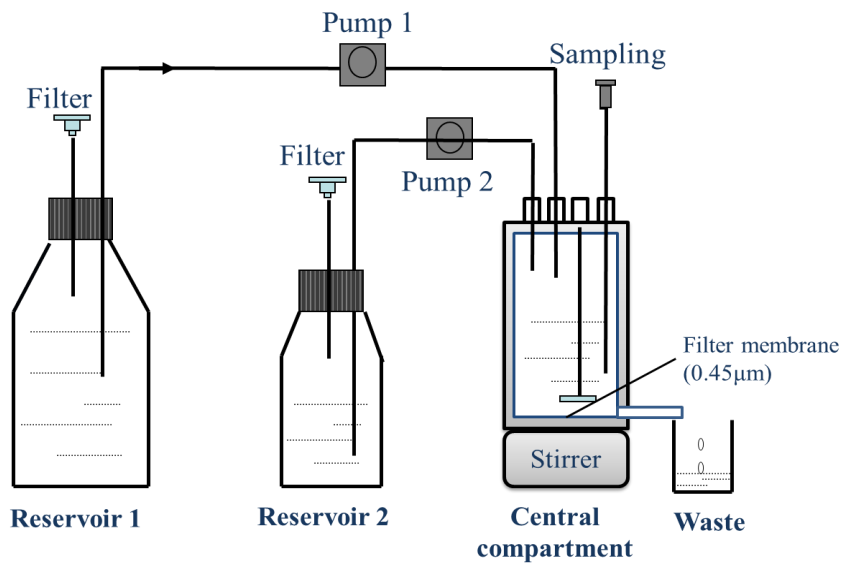

**Fig. S5** Schematics of the *in vitro* PK/PD model. The volume of culture medium in central compartment was 200 mL. Bacterial solution was filtered by 0.45- $\mu\text{m}$  membrane to prevent bacterial loss. The peristaltic pump was digitally controlled by a computer using WinLIN 3.2 software (Cole-Parmer Co. Ltd.). The flowing rate was regulated by section-divided modulation to mimic plasma drug concentrations in patients.

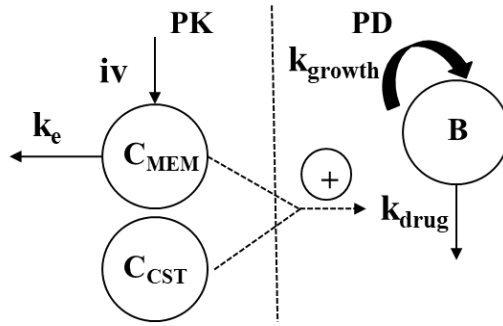

**Fig. S6** Schematics of the pharmacokinetic/pharmacodynamic (PK/PD) model characterizing the killing effect of colistin and meropenem.

**Table S1.** MICs of ATCC19606 and clinical CRAB isolates

| Strain | ATCC   |        |        |        |        |        |        |        | AB   | AB   |
|--------|--------|--------|--------|--------|--------|--------|--------|--------|------|------|
|        | 19606  | 050111 | 020411 | 120211 | 070311 | 070411 | 080411 | 080511 | 1845 | 2092 |
| CST    | 1      | 0.5    | 1      | 0.5    | 0.5    | 0.5    | 1      | 0.5    | 0.5  | 1    |
| MEM    | 0.5    | 128    | 32     | 32     | 32     | 64     | 32     | 32     | 32   | 128  |
| RIF    | 2      | 4      | 4      | 4      | 2      | 2      | 4      | 4      | 4    | 8    |
| FOF    | 64     | 128    | 64     | 128    | 128    | 128    | 128    | 128    | 128  | >128 |
| MIN    | <0.125 | 4      | 8      | 2      | 1      | 1      | 0.5    | 2      | 4    | 8    |

CST, colistin; MEM, meropenem; RIF, rifampicin; FOF, fosfomycin; MIN, minocycline; MIC, minimum inhibitory concentration.

CLSI breakpoints: CST, S:  $\leq 2$ mg/L, R:  $\geq 4$ mg/L, MEM, S:  $\leq 2$ mg/L, I: 4mg/L, R:  $\geq 8$ mg/L; MIN, S:  $\leq 4$ mg/L, I: 8mg/L, R:  $\geq 16$ mg/L.



**Table S2.** Synergistic effects of each combination against 9 clinical isolates.

| <b>Combination</b> | <b>Number of strains</b> |                     |                   | <b>Synergy rate (%)</b> |
|--------------------|--------------------------|---------------------|-------------------|-------------------------|
|                    | <b>Synergy</b>           | <b>Indifference</b> | <b>Antagonism</b> |                         |
| CST-MEM            | 4                        | 5                   | 0                 | 44                      |
| CST-RIF            | 5                        | 4                   | 0                 | 56                      |
| CST-FOF            | 1                        | 8                   | 0                 | 11                      |
| CST-MIN            | 3                        | 6                   | 0                 | 33                      |

CST, colistin; MEM, meropenem; RIF, rifampicin; FOF, fosfomycin; MIN, minocycline

Synergy rate (%) = No. of strains showing synergy / total number of strains

**Table S3.** Observed and predicted concentrations of meropenem dosed at 2 g with 3-h infusion

| <b>Time(h)</b> | <b>Predicted concentration<br/>(mg/L)</b> | <b>Measured concentration (n=3)<br/>(mg/L)</b> |
|----------------|-------------------------------------------|------------------------------------------------|
| 0              | 0                                         | 0.04±0.05                                      |
| 1              | 24.3                                      | 19.7±1.07                                      |
| 2              | 30.6                                      | 28.1±1.39                                      |
| 3              | 32.9                                      | 29.3±0.9                                       |
| 3.5            | 17.2                                      | 14.0±0.76                                      |
| 4              | 10.0                                      | 7.58±0.58                                      |
| 4.5            | 6.5                                       | 4.56±0.4                                       |
| 5              | 4.5                                       | 2.96±0.43                                      |
| 6              | 2.4                                       | 1.36±0.11                                      |

**Table S4.** Parameter estimates for the static time-kill study

| <b>Parameter</b>           | <b>Explanation</b>                                       | <i>A. baumannii</i> | <i>A. baumannii</i> | <i>A. baumannii</i>   |
|----------------------------|----------------------------------------------------------|---------------------|---------------------|-----------------------|
|                            |                                                          | <b>050111</b>       | <b>1845</b>         | <b>2092</b>           |
| $k_{growth}(h^{-1})$       | rate constant of bacterial net growth                    | 0.692               | 0.986               | 0.984                 |
| $B_{max}(\log_{10}CFU/mL)$ | bacterial count in the stationary phase                  | 9.27                | 8.84                | 8.81                  |
| $E_{max\_CST}(h^{-1})$     | maximum achievable kill rate constant by colistin        | 4.09                | 1.07                | 9.01                  |
| $EC_{50\_CST}(mg/L)$       | colistin concentration that results in 50% of $E_{max}$  | 0.489               | 0.0141              | 0.364                 |
| $E_{max\_MEM}(h^{-1})$     | maximum achievable kill rate constant by meropenem       | 0.014               | 0.719               | 0.16                  |
| $EC_{50\_MEM}(mg/L)$       | meropenem concentration that results in 50% of $E_{max}$ | 4.00                | 7.01                | 2.40                  |
| $\gamma_{CST}$             | hill factor for colistin                                 | 1.73                | 2.72                | 4.13                  |
| $\gamma_{MEM}$             | hill factor for meropenem                                | 30.6                | 5.54                | $1.24 \times 10^{-7}$ |
| $f$                        | maximal adaptation factor                                | 7.82                | 40.7                | 0.561                 |
| $k$                        | rate of adaptation                                       | 0.0667              | 0.575               | 1.70                  |

---

|                 |                                       |      |      |      |
|-----------------|---------------------------------------|------|------|------|
| <i>Int</i>      | parameter describing drug interaction | 5.53 | 9.99 | 2.50 |
| <i>Fval</i> (%) | residual error fraction               | 1.38 | 3.43 | 2.77 |

---

**Table S5.** Pharmacokinetic parameters of meropenem

| Parameter             | Explanation                                                          | Dose  |            |
|-----------------------|----------------------------------------------------------------------|-------|------------|
|                       |                                                                      | 0.5 g | 1 g or 2 g |
| $k_e$ ( $h^{-1}$ )    | elimination rate constant                                            | 1.39  | 1.34       |
| $V_1$ (L)             | volume of central compartment                                        | 13.7  | 13.8       |
| $V_2$ (L)             | volume of peripheral compartment                                     | 5.49  | 5.97       |
| $k_{12}$ ( $h^{-1}$ ) | speed constant from central compartment<br>to peripheral compartment | 0.506 | 0.323      |
| $k_{21}$ ( $h^{-1}$ ) | speed constant from peripheral<br>compartment to central compartment | 1.26  | 0.750      |
